1 **Reversing compulsive cocaine seeking with low frequency deep brain stimulation of the**  
2 **subthalamic nucleus**

3 Mickaël Degoulet<sup>1</sup>, Alix Tiran-Cappello<sup>1</sup>, Christelle Baunez<sup>1\*</sup> and Yann Pelloux<sup>1†</sup>

4 **TEXT**

5 Addictive individuals continue to seek and take drugs of abuse despite obvious negative  
6 consequences for their personal, professional and social life.<sup>1</sup> Although significant advances have  
7 been made in our understanding of brain mechanisms leading to compulsive drug seeking/taking,  
8 there is still no FDA-approved pharmacological treatment for cocaine addiction. Resurgence of  
9 surgical techniques such as deep brain stimulation (DBS) for the treatment of neurodegenerative and  
10 psychiatric diseases, including Parkinson's disease (PD), obsessive compulsive disorders (OCD) and  
11 depression,<sup>2-4</sup> has recently opened new therapeutic perspectives for the treatment of addictive  
12 disorders. Although the ideal brain target is still a matter of debate,<sup>5-7</sup> the subthalamic nucleus (STN)  
13 stands as a solid candidate since its 130 Hz DBS reduces drug-induced addiction-like behaviors.<sup>8-10</sup>  
14 Here we used a rat model of compulsive cocaine seeking<sup>11,12</sup> in which, after extended cocaine taking  
15 history, a subset of rats compulsively seek cocaine despite intermittent punishment by mild electric  
16 foot shock. We show that this pathological behavior is predicted by an abnormal increase in STN low  
17 frequency oscillations power, especially in the theta band (6-12 Hz), during prolonged cocaine  
18 consumption. Conversely, very low frequency (8 Hz) stimulation of the STN of 'shock-sensitive' rats  
19 during extended cocaine access triggers compulsive drug seeking upon subsequent re-exposure to  
20 the punishment, demonstrating that abnormal very low frequency oscillatory activity within the STN is  
21 causally involved in the emergence of compulsive cocaine seeking and represents a predictive marker  
22 of pathological drug seeking. Finally, we also demonstrate that 30 Hz, but not 130 Hz, STN DBS has a  
23 beneficial effect at reducing compulsive cocaine seeking in 'shock-resistant' animals. By evidencing a  
24 frequency-dependent bidirectional control of STN DBS on compulsive cocaine seeking, our results  
25 outline the critical contribution of the STN to the onset and maintenance of pathological cocaine  
26 seeking behaviors and further emphasize the therapeutic potential of STN DBS for the treatment of  
27 addiction.

---

<sup>1</sup>Institut de Neurosciences de la Timone, UMR7289 CNRS & Aix-Marseille Université, Marseille, France.

<sup>†</sup>Present address: Department of Neuroscience and Physiology, Neuroscience Institute, New York University Medical Center, New York, NY 10016, USA.

28           Whereas the majority of cocaine users quit as they experience the negative consequences of  
29 drug use, some lose control over their drug taking and compulsively seek drugs. Identifying possible  
30 predictive biomarkers of compulsive drug use thus remains a key challenge for both the prevention  
31 and the treatment of addiction. Here we used a rat model of addiction in which a subset of animals  
32 with an extended cocaine self-administration history keep seeking drug despite intermittent  
33 punishment by foot shock.<sup>11,12</sup> Following training in the cocaine seeking-taking chained schedule of  
34 reinforcement, consisting in 10-daily seeking cycles (2 h-sessions), which completion (see online  
35 methods for details) triggered access to the cocaine taking lever, animals were subjected to 6 h-daily  
36 access to cocaine for 15 days, allowing them to lose control over drug intake.<sup>13</sup> Then, after five  
37 sessions of baseline seeking, animals experienced eight daily sessions of punishment in which 50% of  
38 the cycles ended with delivery of a mild foot shock (0.5 mA, 0.5 sec) with no access to the taking lever  
39 (Fig. 1a). Punishment exposure revealed a small population of rats that kept seeking the drug despite  
40 the foot shock (Fig. 1b,c), as previously reported.<sup>11,12,14,15</sup> Indeed, the compulsivity score (*i.e.* averaged  
41 number of completed seeking cycles during the last four punishment sessions) identified ~1/3 of the  
42 animals as 'shock-resistant' or 'compulsive': they completed  $\geq 30\%$  of the 10-daily seeking cycles, in  
43 contrast to 'shock-sensitive' and control (no cocaine escalation, Extended data Fig. 1) animals which  
44 displayed a lower compulsivity score (Extended data Fig. 2a). Remarkably, 'shock-resistant' and  
45 'shock-sensitive' rats could not be differentiated nor predicted in terms of cocaine intake during  
46 escalation, basal cocaine seeking (number of cycles completed or lever presses on the last baseline  
47 session) and there was no correlation between number of lever presses before exposure to  
48 punishment and compulsivity score (Fig. 1b,c; Extended data Fig. 2b-d). During seeking sessions,  
49 animals were independently given the opportunity to nosepoke for an unpunished sucrose reward.  
50 Importantly, sucrose seeking was not altered during punished cocaine seeking sessions in both  
51 'sensitive' and 'resistant' populations (Extended data Fig. 1e), indicating that the effect of punishment  
52 was specific to the punished seeking response and did not reflect a general suppression of  
53 responding.

54           The STN has recently received much attention in compulsive-like behaviors, including  
55 addiction, since its high frequency (~130 Hz) DBS reduces the motivation to take cocaine.<sup>9</sup> It also  
56 prevents both escalation of cocaine intake and re-escalation of cocaine<sup>8</sup> or heroin<sup>10</sup> intake, normally  
57 observed after protracted abstinence. Furthermore, development of cocaine escalation induces a

58 pathological increase in STN low frequency oscillations, measured with local field potentials (LFPs),  
59 suggesting a key contribution of the STN oscillatory activity to the development of loss of control over  
60 drug intake.<sup>8</sup> Thus, as cocaine escalation is a prerequisite to the emergence of compulsive drug  
61 seeking (Fig. 1a, Extended data Fig. 1), we hypothesized that STN oscillatory activity might also be  
62 involved in the onset of this behavior. To address this issue, we recorded LFPs, through DBS  
63 electrodes implanted in the STN, during the cocaine escalation protocol (15-min before and after  
64 cocaine access on days 1, 4, 8, 12 and 15, Fig. 2a). Following the punishment sessions and the  
65 characterization of rats' compulsivity status (Fig. 2b), analysis of STN LFPs power spectrum revealed  
66 two distinct patterns of activity during the development of cocaine escalation: 'shock-resistant' animals  
67 exhibited a progressive increase in STN low (6-40 Hz), but not high (65-90Hz), frequency oscillation  
68 powers during LFPs baseline recordings (*i.e.* before cocaine access) that was not observed in 'shock-  
69 sensitive' rats (Fig. 2c, Extended data Fig. 3a). Band-specific analysis revealed significant power  
70 increases of STN oscillations in alpha/theta (6-13Hz) and low/high beta (14-40Hz), but not in the  
71 gamma (65-90Hz), bands during escalation of cocaine intake in 'shock-resistant' rats (Fig. 2d-f).  
72 Interestingly, these pathological increases were no longer present after cocaine self-administration  
73 (Fig. 2d-f, Extended data Fig. 3b), in line with the ability of dopaminergic agonist treatment to reduce  
74 STN pathological oscillations in both PD monkeys and patients.<sup>16-18</sup> Rather than reflecting an  
75 enhanced craving following the daily 18 h-abstinence period experienced by all animals during the  
76 escalation protocol, these pathological increases of low frequency oscillation power could represent a  
77 predictive biomarker of compulsivity. In agreement with this, the STN alpha/theta (6-13 Hz) oscillatory  
78 activity has also been shown to correlate with symptom severity in OCD patients.<sup>19,20</sup>

79 We next tested the causal role of increased STN low frequency oscillation on the emergence  
80 of compulsive cocaine seeking by applying an artificial alpha/theta or gamma stimulation in the STN of  
81 'shock-sensitive' animals during cocaine escalation. Following the determination of their seeking  
82 phenotype during the initial cocaine escalation-punishment protocol sequence (Fig. 3a), 'shock-  
83 sensitive' rats (Fig. 3b, Extended data Fig. 4a) were stimulated within the STN (0 Hz, 8 Hz or 70 Hz),  
84 during a second escalation of cocaine intake (escalation-2) before being re-exposed to the  
85 punishment protocol (punishment-2, Fig. 3a). STN DBS at 8 Hz or 70 Hz had no effect on cocaine  
86 intake during escalation-2 (Fig. 3b), indicating that only STN 130 Hz DBS can reduce re-escalation of  
87 drug intake,<sup>8,10</sup> and did not change the rats' pattern of cocaine consumption observed during

88 escalation-1 (Extended data Fig. 4b). Likewise, there was no change in their level of cocaine seeking  
89 during baseline-2, compared to baseline-1 in the punishment protocol (Extended data Fig. 4c,d).  
90 However, when punishment was re-introduced, 8 Hz-stimulated rats became resistant to punishment  
91 (Fig. 3d), as evidenced by the switch in their compulsivity score (Fig. 3e), in stark contrast to control (0  
92 Hz) and 70 Hz-stimulated animals that quickly stopped seeking cocaine. Of note, sucrose seeking  
93 levels were not altered in any groups between both punishment protocols (Extended data Fig. 4e).  
94 Although recent evidences revealed the role of STN in neuronal pain processing,<sup>21</sup> the resistance to  
95 the foot-shock induced by the STN 8 Hz stimulation did not reflect changes in pain perception, since  
96 such treatment (6 h/day, 14 days) of 'shock-sensitive' animals did not affect nociceptive responses on  
97 a hot-plate (Extended data Fig. 5). Thus, by specifically manipulating the STN alpha/theta band activity  
98 during cocaine escalation, we switched the compulsivity status of 'shock-sensitive' rats towards  
99 'shock-resistant' phenotypes, thereby confirming that pathological increase in STN low frequency  
100 oscillation powers during escalation represents a causal predictive biomarker of compulsive cocaine  
101 seeking trait. Such marker may be of critical importance for the development of new preventive  
102 strategies and diagnostic tools in humans. Indeed, future investigations aiming at detecting cortical  
103 correlates of STN abnormal activities, as in PD,<sup>22</sup> may help to detect, in a non-invasive fashion (*e.g.*  
104 electroencephalography), vulnerable subjects that could develop pathological seeking despite its  
105 negative consequences.

106 In light of the frequency-dependent beneficial effects of STN DBS in PD and OCD  
107 patients,<sup>2,3,20,23</sup> we tested the ability of STN high (130 Hz) and low (30 Hz) DBS to affect punished  
108 cocaine seeking. Following the characterization of their compulsive status, half of the animals were  
109 then stimulated at 130 Hz-stimulation, while the other half at 30 Hz-stimulation (*i.e.* ON) in the STN  
110 during five punishment sessions. All animals then underwent five punishment sessions with no  
111 stimulation (*i.e.* OFF) before being subjected to another series of five-ON sessions at the other  
112 frequency. These sessions were followed by five-OFF sessions (Fig. 4a). Although 130 Hz STN  
113 stimulation acutely worsened cocaine compulsive seeking of 'shock-resistant' rats on the first two days  
114 of stimulation (Fig. 4b), it had no long-lasting effect on cocaine seeking in both groups (Fig. 4c,d). In  
115 contrast, 30 Hz STN stimulation progressively decreased pathological cocaine seeking of 'shock-  
116 resistant' animals, without affecting the behavior of 'shock-sensitive' rats (Fig. 4e-g). This effect was  
117 transiently reversed during the OFF-period, highlighting the reversibility of the DBS procedure.

118 Interestingly, 30 Hz-STN had no noticeable side effects: it did not promote compensatory sucrose  
119 seeking (Extended data Fig. 6) and did not affect animals' locomotor activity (Extended data Fig. 7)  
120 nor nociceptive responses (Extended data Fig. 8).

121 Here, we uncover a STN DBS bi-directional control over compulsive cocaine seeking  
122 (Extended data Fig. 9), which is frequency (8 Hz vs. 30 Hz)- and addiction stage (escalation vs.  
123 punished seeking)-dependent. Our data also emphasize the necessity to correctly apply STN DBS to  
124 avoid deleterious effects, as previously observed in PD patients.<sup>23</sup> Indeed, 8 Hz STN DBS, which does  
125 not affect cocaine re-escalation, triggers compulsive cocaine seeking in non-compulsive animals.  
126 Likewise, 130 Hz STN DBS, which reduces cocaine escalation and relapse,<sup>8</sup> acutely increases  
127 pathological seeking of compulsive rats. Mechanisms sustaining these beneficial and deleterious  
128 effects remain to be elucidated. However, as in PD,<sup>24,25</sup> STN pathological oscillations may directly alter  
129 prefrontal neuron activity, which normally drives decision-making and reward seeking,<sup>26</sup> via antidromic  
130 propagation along the hyperdirect pathway.<sup>27</sup> Indeed, following cocaine escalation and punished  
131 cocaine seeking, the prefrontal cortex of 'shock-resistant' animals is hypoactive.<sup>11</sup> In these animals, 30  
132 Hz STN DBS might thus antidromically 're-boost' prefrontal neuron activity to reduce compulsive  
133 cocaine seeking, as observed with local low frequency photostimulation.<sup>11</sup> To date, there is no FDA-  
134 approved pharmacological treatment for patients suffering from addictive disorders. We evidence here  
135 the STN critical contribution to the onset and maintenance of compulsive-like behaviors and further  
136 demonstrate the therapeutic potential of STN DBS for addiction. Given its efficiency and safety in other  
137 pathologies, our present and previous works<sup>8,9</sup> may shape the framework of a STN DBS-based  
138 therapeutic sequence, where specific frequencies would be applied at precise addiction stages to  
139 reduce or reverse addiction criteria in order to normalize pathological seeking and consummatory  
140 behaviors toward a more recreational/controlled pattern of use.

141

## 142 **METHODS**

143 **Animals.** Adult Lister Hooded males (~380 g, Charles River, N = 74) were paired housed, in Plexiglas  
144 cages and maintained on an inverted 12h light/dark cycle (light onset at 7 pm) with food and water  
145 available *ad libitum*, in a temperature- and humidity-controlled environment. All animal care and use  
146 conformed to the French regulation (Decree 2010-118) and were approved by local ethic committee  
147 and the University of Aix-Marseille (#3129.01).

148 **Electrode design for STN DBS or LFP recordings.** The electrodes were made out of Platinum-  
149 Iridium wires coated with Teflon (75  $\mu\text{m}$ ). Coating was removed over 0.5 mm at the tips and two wires  
150 were inserted into a 16 mm stainless steel tubing to form an electrode. Two electrodes, separated by a  
151 distance of 4.8 mm (*i.e.* twice the STN laterality), were soldered to an electric connector, allowing  
152 connection with both recording and stimulation devices. Electrodes (impedance = 20  $\text{k}\Omega \pm 2.25$ ) and  
153 connector were subsequently deeply bound, using a custom mold and dental cement. Finally,  
154 electrodes were tested with an isolated battery to avoid electrical short circuits.

155 **Catheter and stereotaxic surgeries.** Rats were implanted with a chronically indwelling intravenous  
156 catheter, as previously described.<sup>8,9</sup> Briefly, rats were anesthetized with ketamine (Imalgen, Merial,  
157 100 mg/kg, *s.c.*) and medetominine (Domitor, Janssen, 30 mg/kg, *s.c.*) following a preventive long-  
158 acting antibiotic treatment (amoxicillin, Duphamox LA, Pfizer, 100 mg/kg, *s.c.*). A homemade silicone  
159 catheter (0.012-inch inside diameter, 0.025-inch outside diameter, Plastics-One) was inserted and  
160 secured into the right jugular vein. The other extremity of the catheter was placed subcutaneously in  
161 the mid-scapular region and connected to a guide cannula secured with dental cement. Animals were  
162 then placed in a stereotaxic frame (David Kopf apparatus) and maintained under  
163 ketamine/medetominine anesthesia. Electrodes were inserted bilaterally in the STN (in mm:<sup>28</sup> -3.7 AP,  
164  $\pm 2.4$  L from bregma, -8.35 DV from skull surface, with the incisor bar at -3.3 mm). Four anchoring  
165 screws (the one on the right frontal lobe designated as the electric reference allowing LFP recordings  
166 in some animals) were fixed into the skull. Electrodes, screws and skull were deeply bounded with  
167 dental cement. After surgery, rats were awakened with an injection of atipamezol (Antisedan, Janssen,  
168 0.15 mg/kg *i.m.*) and allowed to recover for at least 7 days with *ad libitum* access to food and water.  
169 The catheters were daily flushed during the recovery period and just before and after each self-  
170 administration session with a saline solution containing heparin (Sanofi, 3 g/l) and enroflorilexine  
171 (Baytril, Bayer, 8g/L) to maintain their patency and to reduce infection. Catheters were also regularly  
172 tested with propofol (Propovet, Abbott, 10 mg/ml) to confirm their patency.

173 **Behavioral apparatus.**

174 *Self-administration apparatus:* behavioral experiments were performed during the dark phase and took  
175 place in standard rat operant chambers (MedAssociates), located in sound-attenuating cubicles,  
176 equipped with a house light, two retractable levers, which flanked a sucrose magazine, set 7 cm above  
177 the metallic grid floor through which an electric foot shock could be delivered via a generator

178 (MedAssociates). A cue light was positioned 8 cm above each lever. For each rat, one lever was  
179 randomly paired with cocaine infusion (taking-lever) while the other one was designated as the  
180 seeking-lever. For intravenous drug administration, the stainless-steel guide cannula of the catheter  
181 was connected through steel-protected tygon tubing to a swivel (Plastics One) and then an infusion  
182 pump (MedAssociates). Data were acquired on a PC running MED-PC IV (MedAssociates). Sessions  
183 lasted for 2 h or 6 h (see below for detailed procedures).

184 *Locomotor activity apparatus*: Locomotor activity was measured as the distance traveled (in meters) in  
185 a circular home-made Perspex open field (60 cm diameter). A video tracking system was placed  
186 above the open field. Data were acquired by the software Bonsai (Open Ephys), recorded on a PC  
187 computer and analyzed offline with Matlab.

188 *Hot plate apparatus*: Animals were placed on a hot plate analgesia meter (Harvard apparatus)  
189 maintained at  $52.0 \pm 0.5$  °C. Rats were constantly observed during the test to detect the first sign of  
190 pain (paw licking, rapid movements, escape...) to quickly remove them from the apparatus. Animal's  
191 behavior was also recorded by a video tracking system. Data were acquired by the software Bonsai  
192 (Open Ephys). Latency to react was quantified offline by an experimenter blind to the DBS treatment.

193 **Acquisition of cocaine self-administration under the seek-take task schedule.** At least one week  
194 after surgery, rats began cocaine self-administration training using the seek-take chain schedule,  
195 adapted from the previously described procedure.<sup>12</sup> Self-administration training was divided into four  
196 distinct phases: acquisition of the taking response; training on the seek-take chain; extended self-  
197 administration and punishment.

198 **Acquisition of the taking response.** In this initial phase, each trial started with the illumination of the  
199 house light and the insertion of the taking-lever. One press on the lever, under a fixed ratio schedule  
200 (FR-1), resulted in the delivery of a single infusion of cocaine (250 µg/90 µL over 5 s, Coopérative  
201 pharmaceutique française). Cocaine infusions were paired with illumination of the cue light (5 s) above  
202 the taking lever, retraction of the taking-lever and extinction of the house light. Following a 20 s time  
203 out-period, another trial was initiated with the insertion of the taking-lever. Training of the taking  
204 response continued, typically for six to eight sessions, until animals reached a stable level of cocaine  
205 intake (< 20% changes across 3 consecutive sessions), after which they advanced to the seeking-  
206 taking chain schedule.

207 **Training on the seeking-taking chain schedule.** Each cycle started with the illumination of the



208 house light, insertion of the seeking-lever and retraction of the taking-lever. A single press on the  
209 seeking-lever resulted in the retraction of the seeking-lever and the insertion of the taking-lever, which  
210 activation then triggered cocaine delivery, illumination of the associated cue-light and retraction of the  
211 taking-lever and extinction of the house light. Following a 20 s time-out refractory period, another cycle  
212 was initiated with the insertion of the seeking-lever.

213         Once animals reached a stable level (< 20% variation in number of cycles completed across 3  
214 consecutive sessions), a random interval (RI) schedule was introduced into the seeking-link of the  
215 chain schedule. Here, the first seeking-lever press initiated a RI schedule of 2 s, which progressively  
216 increased to 15, 30, 60 and 120 s during training. Seeking-lever presses within the RI had no  
217 programmed consequences. The first seeking-lever press following the end of the RI lead to the  
218 retraction of the seeking-lever and the insertion of the taking-lever, which press triggered the cocaine  
219 delivery, paired with the illumination of the associated cue-light as during the training of the taking  
220 response, thereby ending the seeking-taking cycle. Each cycle was followed by a 2 min time-out (TO)  
221 period, where both levers were retracted, which progressively increases to 4 and 10 min over  
222 consecutive training days, before initiation of the next seek-take cycle. Training on each RI-TO  
223 schedule persisted until animals displayed less than 20% variation in the numbers of cycle completed.  
224 Once an animal achieved stable cocaine seeking behavior at a RI-TO schedule, usually 5-7 days, it  
225 was advanced to the next RI-TO schedule.

226         During these sessions, rats were also trained to nose poke into the sucrose magazine to  
227 obtain 0.04 ml of a 20% sucrose solution, which was delivered under a RI schedule, which parameter  
228 was progressively increased to 60 s. Sucrose seeking-taking behavior occurred concurrently and  
229 independently to the cocaine seeking-taking schedule, thereby allowing us to specifically investigating  
230 'natural' reward seeking.

231         At the end of training under the seeking-taking schedule, animals were allowed to complete up  
232 to 10 cocaine cycles and 120 sucrose deliveries in each 2 h session of the RI120-TO10 schedule.

233 **Extended cocaine self-administration.** After reaching the RI120-TO10 schedule criteria of the  
234 seeking-taking schedule, all animals (except those Extended data Figs. 1 and 6, which underwent  
235 punishment protocol right after completed RI120-TO10 schedule), were submitted to escalation  
236 protocol, in which they were allowed to self-administer cocaine over 6 h for 15 consecutive days to  
237 loss control over their cocaine intake,<sup>13</sup> a cardinal criteria of human drug addiction.<sup>1</sup> Here, sessions



238 started with the illumination of the house light and the insertion of the taking-lever. As in the training  
239 phase, each press on this lever triggered cocaine delivery and the illumination of the associated cue-  
240 light, followed by a 20 s TO. Sucrose seeking was unavailable during extended cocaine self-  
241 administration sessions. After 15 days, animals were re-subjected to the seek-take RI120-TO10  
242 schedule, as described above, during five days to establish post-escalation cocaine seek-take  
243 baseline.

244 **Punishment.** After RI120-TO10 baseline, animals were subjected to 8 daily sessions under the  
245 resistance to punishment paradigm.<sup>12</sup> Here, half of the completed RI120-TO10 cycles resulted in  
246 randomly (50%) mild foot shock delivery (0.5 mA, 0.5 s) to the animals' paws: punishment was  
247 administered following the first press on the seeking-lever after the RI120 schedule has elapsed, with  
248 no access to the taking lever. The other half of the RI120 completed triggered the insertion of the  
249 taking lever, which press initiated cocaine delivery and illumination of the associated cue-light. Thus,  
250 animals randomly received up to five foot-shocks and five cocaine infusions. Compulsivity score was  
251 defined as the average number of completed cycles (foot-shocks + cocaine deliveries) during the last  
252 four sessions of the punishment paradigm. Animals with a compulsivity score > 2.5 (*i.e.*, completed  
253 more than 25% of the 10-daily seeking cycles during the last four sessions of the punishment  
254 paradigm) were classified as 'compulsive' or 'shock-resistant'.

255 **Spontaneous- and cocaine-induced locomotor activity measurement.** Treatment order (saline-  
256 OFF, cocaine-OFF, saline-ON, cocaine-ON) was counterbalanced between animals with a seven-day  
257 period between each treatment. Animals were first placed in the open field and connected to the  
258 stimulation for a 60 min period of habituation. They were then injected with either saline (0.9% NaCl, 1  
259 ml/kg) or a low dose of cocaine (5 mg/kg, *s.c.*) and their locomotor activity was recorded for 60 h with  
260 DBS ON or OFF.

261 **Hot plate analgesia measurement.** Basal nociceptive response was determined before the first STN  
262 DBS session. Then, animals were subjected to 6 h-STN DBS (at 8 Hz) for 14 consecutive days  
263 accordingly with the procedure used to test the effects of this frequency applied during the escalation  
264 procedure. Their nociceptive responses were tested after the first and the last sessions of STN 8 Hz  
265 DBS (Extended data Fig. 5). In another set of animals, the effects of 2 h-STN DBS (at 0, 30 or 130 Hz)  
266 for 5 consecutive days accordingly with the procedure used to test the effects of these frequencies on  
267 the compulsivity measures were tested on nociceptive responses after the first and the last sessions of

268 STN DBS (Extended data Fig. 8).

269 **Recording and analysis of STN LFP activity.** LFP recordings were performed in similar operant  
270 chambers as above with no access to cocaine. They were further equipped with wires connected to  
271 the acquisition setup. Animals were connected to the interface and placed in the chamber where they  
272 could freely move. STN electric activity was recorded 15-min before and after extended cocaine  
273 access on days 1, 4, 8, 12 and 15 of the escalation protocol.

274 Signals were amplified and filtered using a Neuralynx8 amplifier. Data were acquired using  
275 Sciworks software (Datawave Tech, USA) with a sampling rate of 1kHz in the range of 1- 475Hz.  
276 Signals were filtered off-line with a Chebyshev low pass filter (corner 98Hz, order 10, ripple 0.5) and a  
277 notch filter were applied, to remove 50Hz noise created by surrounding electrical devices, using  
278 Spike2 software (CED). Data were then carefully examined to ensure removal of electrical noise the  
279 specific activity of the STN (*i.e.* difference of potential between the two wires within the same STN)  
280 was then calculated and ultimately treated using Matlab (Mathworks) software. As such, the analysis  
281 was limited to the following frequency bands: 4-40 Hz and 65-90 Hz.

282 **Deep brain stimulation.** DBS was delivered to the STN by a digital stimulator (DS8000, WPI) via a  
283 stimulus isolator (DLS100, WPI) and a rotating commutator (Plastics-One) wired to the implanted  
284 electrodes. Stimulation parameters were adapted from previous studies.<sup>8,9</sup> Briefly, individual  
285 stimulation intensity parameters was determine using 130 Hz frequency and 80  $\mu$ s pulse width  
286 stimulation. Intensity was progressively increased until the appearance of hyperkinetic movements.  
287 Stimulation intensity (50-150  $\mu$ A) was setup just below the hyperkinetic movement threshold.

288 Before each behavioral session, animals were connected to the stimulation device, STN DBS  
289 was turned ON and stimulation intensity was progressively increased to reach the pre-determined  
290 stimulation parameters prior the start of the session. Depending on the condition tested, 8, 30 or 130  
291 Hz were applied during 1, 2 or 6 h.

292 **Histology.** At the end of the experiment, the rats were euthanized with an *i.p.* injection of pentobarbital  
293 (Dolethal). Brains were removed and frozen into liquid isopentane (-80°C) to be further cut in 40  $\mu$ m  
294 thick frontal slices with a cryostat. Histological controls for location of the electrodes were performed  
295 after staining with cresyl violet by an observer blind to treatment group (Extended data Figs. 3c, 4f, 5b,  
296 6c, 7c, 8b). Animals with incorrect electrode placement (n = 10), as well as those with catheter  
297 clogging (n = 4) were excluded from statistical analysis. The final n values are indicated in the figure

298 legends.

299

300 **Statistical analyses:**

301 No statistical methods were used to predetermine sample size, but our samples are comparable to  
302 those reported in previous studies.<sup>8,9,12</sup> Group assignment was pseudo-randomized for most  
303 experiments, as rats were assigned to experimental group in a counterbalanced fashion based on  
304 their initial basal cocaine seeking levels. Treatment assignment was randomized between  
305 experimental groups. Data are expressed as mean  $\pm$  s.e.m. with the exact sample size indicated for  
306 each group in figure legends. Using Prism 6.0 (GraphPad) and Matlab (Mathworks) softwares, data  
307 were analyzed two-tailed *t* test, one- or two-way repeated measures ANOVAs, followed by Bonferroni  
308 *post hoc* test when applicable. Only *P*-values < 0.05 were considered significant. Power analysis was  
309 further performed with the G\*Power software to confirm that our sample sizes were sufficient to detect  
310 reliable changes for critical experiments (power  $\geq$  80% at a level of confidence  $p < 0.05$ ; values are  
311 reported in the statistical table).

312

313 **REFERENCES**

- 314 1. American Psychiatric Association. Diagnostic and Statistical Manual of Mental Disorders, 5th  
315 Edition. in *Diagnostic and Statistical Manual of Mental Disorders, 5th Edition* (American Psychiatric  
316 Publishing, Inc, 2013).
- 317 2. Limousin, P. *et al.* Effect of parkinsonian signs and symptoms of bilateral subthalamic nucleus  
318 stimulation. *Lancet Lond. Engl.* **345**, 91–95 (1995).
- 319 3. Mallet, L. *et al.* Subthalamic nucleus stimulation in severe obsessive-compulsive disorder. *N.*  
320 *Engl. J. Med.* **359**, 2121–2134 (2008).
- 321 4. Mayberg, H. S. *et al.* Deep brain stimulation for treatment-resistant depression. *Neuron* **45**,  
322 651–660 (2005).
- 323 5. Luigjes, J. *et al.* Deep brain stimulation in addiction: a review of potential brain targets. *Mol.*  
324 *Psychiatry* **17**, 572–583 (2012).
- 325 6. Pelloux, Y. & Baunez, C. Deep brain stimulation for addiction: why the subthalamic nucleus  
326 should be favored. *Curr. Opin. Neurobiol.* **23**, 713–720 (2013).
- 327 7. Salling, M. C. & Martinez, D. Brain Stimulation in Addiction. *Neuropsychopharmacology* **41**,

- 328 2798–2809 (2016).
- 329 8. Pelloux, Y. *et al.* Subthalamic nucleus high frequency stimulation prevents and reverses  
330 escalated cocaine use. *Mol. Psychiatry* (2018). doi:10.1038/s41380-018-0080-y
- 331 9. Rouaud, T. *et al.* Reducing the desire for cocaine with subthalamic nucleus deep brain  
332 stimulation. *Proc. Natl. Acad. Sci. U. S. A.* **107**, 1196–1200 (2010).
- 333 10. Wade, C. L. *et al.* High-Frequency Stimulation of the Subthalamic Nucleus Blocks  
334 Compulsive-Like Re-Escalation of Heroin Taking in Rats. *Neuropsychopharmacology* (2016).  
335 doi:10.1038/npp.2016.270
- 336 11. Chen, B. T. *et al.* Rescuing cocaine-induced prefrontal cortex hypoactivity prevents  
337 compulsive cocaine seeking. *Nature* **496**, 359–362 (2013).
- 338 12. Pelloux, Y., Everitt, B. J. & Dickinson, A. Compulsive drug seeking by rats under punishment:  
339 effects of drug taking history. *Psychopharmacology (Berl.)* **194**, 127–137 (2007).
- 340 13. Ahmed, S. H. & Koob, G. F. Transition from moderate to excessive drug intake: change in  
341 hedonic set point. *Science* **282**, 298–300 (1998).
- 342 14. Deroche-Gamonet, V., Belin, D. & Piazza, P. V. Evidence for addiction-like behavior in the rat.  
343 *Science* **305**, 1014–1017 (2004).
- 344 15. Kasanetz, F. *et al.* Prefrontal synaptic markers of cocaine addiction-like behavior in rats. *Mol.*  
345 *Psychiatry* **18**, 729–737 (2013).
- 346 16. Priori, A. *et al.* Rhythm-specific pharmacological modulation of subthalamic activity in  
347 Parkinson's disease. *Exp. Neurol.* **189**, 369–379 (2004).
- 348 17. Brown, P. *et al.* Dopamine dependency of oscillations between subthalamic nucleus and  
349 pallidum in Parkinson's disease. *J. Neurosci. Off. J. Soc. Neurosci.* **21**, 1033–1038 (2001).
- 350 18. Tachibana, Y., Iwamuro, H., Kita, H., Takada, M. & Nambu, A. Subthalamo-pallidal  
351 interactions underlying parkinsonian neuronal oscillations in the primate basal ganglia. *Eur. J.*  
352 *Neurosci.* **34**, 1470–1484 (2011).
- 353 19. Rappel, P. *et al.* Subthalamic theta activity: a novel human subcortical biomarker for obsessive  
354 compulsive disorder. *Transl. Psychiatry* **8**, (2018).
- 355 20. Welter, M.-L. *et al.* Basal ganglia dysfunction in OCD: subthalamic neuronal activity correlates  
356 with symptoms severity and predicts high-frequency stimulation efficacy. *Transl. Psychiatry* **1**, e5  
357 (2011).

- 358 21. Pautrat, A. *et al.* Revealing a novel nociceptive network that links the subthalamic nucleus to  
359 pain processing. *eLife* **7**, (2018).
- 360 22. de Hemptinne, C. *et al.* Exaggerated phase-amplitude coupling in the primary motor cortex in  
361 Parkinson disease. *Proc. Natl. Acad. Sci. U. S. A.* **110**, 4780–4785 (2013).
- 362 23. Timmermann, L. *et al.* Ten-Hertz stimulation of subthalamic nucleus deteriorates motor  
363 symptoms in Parkinson's disease. *Mov. Disord. Off. J. Mov. Disord. Soc.* **19**, 1328–1333 (2004).
- 364 24. Li, Q. *et al.* Therapeutic deep brain stimulation in Parkinsonian rats directly influences motor  
365 cortex. *Neuron* **76**, 1030–1041 (2012).
- 366 25. Mallet, N. *et al.* Disrupted dopamine transmission and the emergence of exaggerated beta  
367 oscillations in subthalamic nucleus and cerebral cortex. *J. Neurosci. Off. J. Soc. Neurosci.* **28**, 4795–  
368 4806 (2008).
- 369 26. Otis, J. M. *et al.* Prefrontal cortex output circuits guide reward seeking through divergent cue  
370 encoding. *Nature* **543**, 103–107 (2017).
- 371 27. Kita, T. & Kita, H. The subthalamic nucleus is one of multiple innervation sites for long-range  
372 corticofugal axons: a single-axon tracing study in the rat. *J. Neurosci. Off. J. Soc. Neurosci.* **32**, 5990–  
373 5999 (2012).
- 374 28. Paxinos, G. & Watson, C. *The rat brain in stereotaxic coordinates.* (Elsevier, 2007).

375

## 376 **END NOTES**

377 **Supplementary information** is available on the online version of the paper.

378 **Acknowledgements:** ANR 2010-NEUR-005-01 in the framework of the ERA-Net NEURON to CB,  
379 CNRS, AMU, French Medical Research Foundation (FRM) DPA20140629789 to CB.

380 **Author contributions:** M.D., C.B. and Y.P. designed and planned all experiments; M.D., A.T.C. and  
381 Y.P. performed experiments and analyzed data; M.D., C.B. and Y.P. wrote the paper. C.B. obtained  
382 the fundings. Y.P and C.B. contributed equally as senior author.

383 **Author information:** The authors declare no conflict of interest. Correspondence and request for  
384 materials should be sent to C.B. ([christelle.baunez@univ-amu.fr](mailto:christelle.baunez@univ-amu.fr)).

385

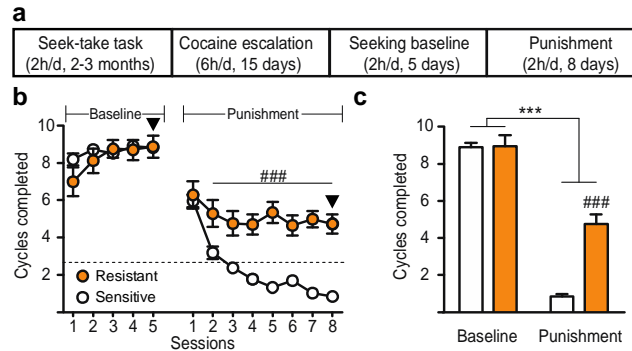

386

387 **Figure 1. Extended cocaine self-administration promotes compulsive cocaine seeking in a**  
388 **subpopulation of rats. a**, Experimental time course. Following extensive training on the seek-take  
389 task, animals were subjected to cocaine escalation protocol (Extended data Fig. 2a). After five days of  
390 baseline cocaine seeking, animals were then exposed to eight punishment sessions, during which foot  
391 shock (with no access to cocaine) was randomly delivered in 50% of the trials. Dashed line indicates  
392 compulsivity threshold below which animals are considered shock-sensitive (see methods). **b**,  
393 Punishment reduced the number of seeking cycles completed in all animals (punishment effect:  
394  $F_{(12,612)} = 117.2$ ,  $P < 0.0001$ ). While both groups displayed equivalent level of cocaine seeking during  
395 baseline (group effect:  $F_{(1,204)} = 0.559$ , *n.s.*), shock-resistant rats (i.e. 'compulsive',  $n = 17$ ) completed  
396 more seeking cycles than shock-sensitive rats ( $n = 36$ ; punishment x group:  $F_{(7,357)} = 7.927$ ,  $P <$   
397  $0.0001$ ; Bonferroni post hoc:  $###P < 0.001$  resistant vs. sensitive) during punishment. **c**, Number of  
398 seeking cycles completed during the last day of baseline and last day of punishment (arrowheads in **b**;  
399 session x group:  $F_{(1,51)} = 35.63$ ,  $P < 0.0001$ ; Bonferroni post hoc:  $***P < 0.001$  baseline vs.  
400 punishment,  $###P < 0.001$  resistant vs. sensitive). Line and bar graphs indicate mean  $\pm$  s.e.m.

401

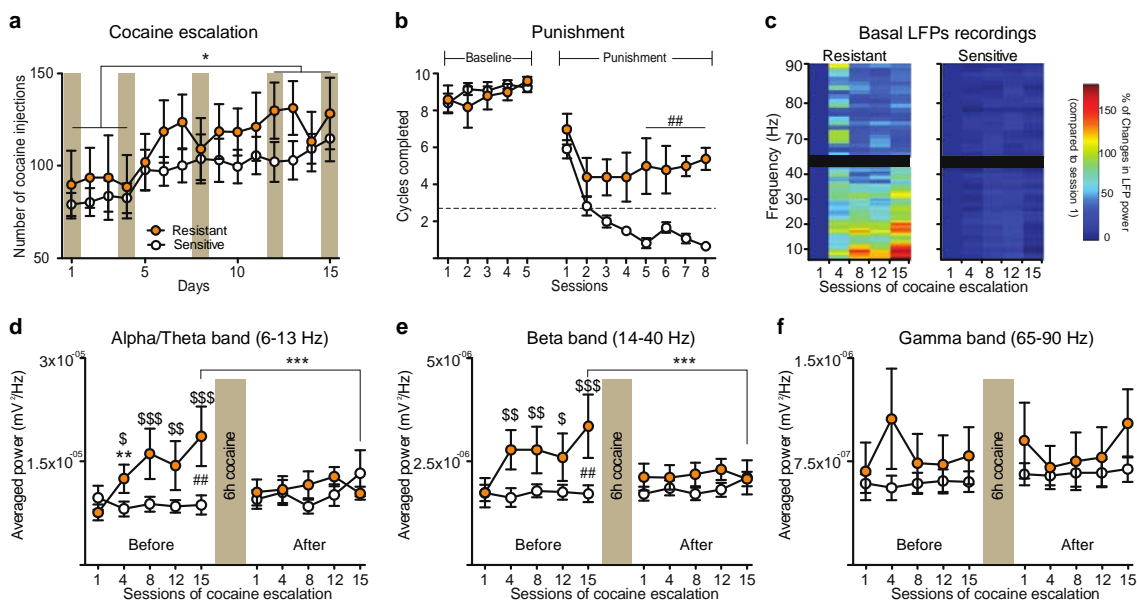

402

403

**Figure 2. Compulsive rats exhibit pathological STN low frequency oscillations during cocaine**

404

**escalation.** **a**, Extended cocaine access (6 h/d, 15 d) induced similar cocaine escalation in ‘future’

405

shock-sensitive ( $n = 12$ ) and -resistant (i.e. ‘compulsive’,  $n = 5$ ) rats (session effect:  $F_{(14,210)} = 6.675$ ,  $P$

406

$< 0.0001$ ; group effect:  $F_{(1,210)} = 0.813$ ,  $n.s.$ ; Bonferroni post hoc:  $**P < 0.01$ ). Brown rectangles

407

indicate LFPs recording sessions. **b**, Punishment reduced the number of seeking cycles completed in

408

all animals (session effect:  $F_{(12,168)} = 76.12$ ,  $P < 0.0001$ ). While both groups displayed equivalent level

409

of cocaine seeking during baseline (group effect:  $F_{(1,60)} = 0.204$ ,  $n.s.$ ), shock-resistant rats completed

410

more seeking cycles than shock-sensitive rats (punishment x group:  $F_{(7,105)} = 3.947$ ,  $P = 0.0007$ ;

411

Bonferroni post hoc:  $##P < 0.01$  resistant vs. sensitive) during punishment. Dashed line indicates

412

compulsivity threshold below which animals are considered shock-sensitive. **c**, Session-frequency

413

power spectrum showing basal (i.e. before cocaine) LFPs power changes normalized (in %) to session

414

1 in shock-resistant (left) and shock-sensitive (right) animals. **d-f**, Quantifications of LFPs power

415

before and after cocaine consumption (6 h). During baseline recordings, shock-resistant rats showed a

416

progressive power increase in alpha/theta (**d**, session effect:  $F_{(4,60)} = 5.481$ ,  $P = 0.0008$ ) and beta (**e**,

417

session effect:  $F_{(4,60)} = 4.119$ ,  $P = 0.0051$ ;  $\$P < 0.05$ ,  $$$P < 0.01$ ,  $$$$P < 0.001$  vs. session 1;  $**P < 0.01$

418

vs. session 15), but not in gamma band (**f**, session effect:  $F_{(4,60)} = 0.909$ ,  $n.s.$ ), which was not observed

419

in shock-sensitive animals (group effect: **d**,  $F_{(1,60)} = 5.454$ ,  $P = 0.034$ ; **e**,  $F_{(1,60)} = 6.035$ ,  $P = 0.027$ ;

420

Bonferroni post hoc:  $##P < 0.01$  resistant vs. sensitive). Cocaine consumption reduces increased

421

power on session 15 in both alpha/theta and beta bands (session x group effect: **d**,  $F_{(9,135)} = 4.059$ ,  $P =$



422 0.0001; **e**,  $F_{(9,135)} = 3.514$ ,  $P = 0.0001$ ; Bonferroni post hoc:  $***P < 0.001$ ) but has no effect in the  
423 gamma band (session x group effect:  $F_{(9,135)} = 1.393$ , *n.s.*). Line graphs indicate mean  $\pm$  s.e.m.  
424

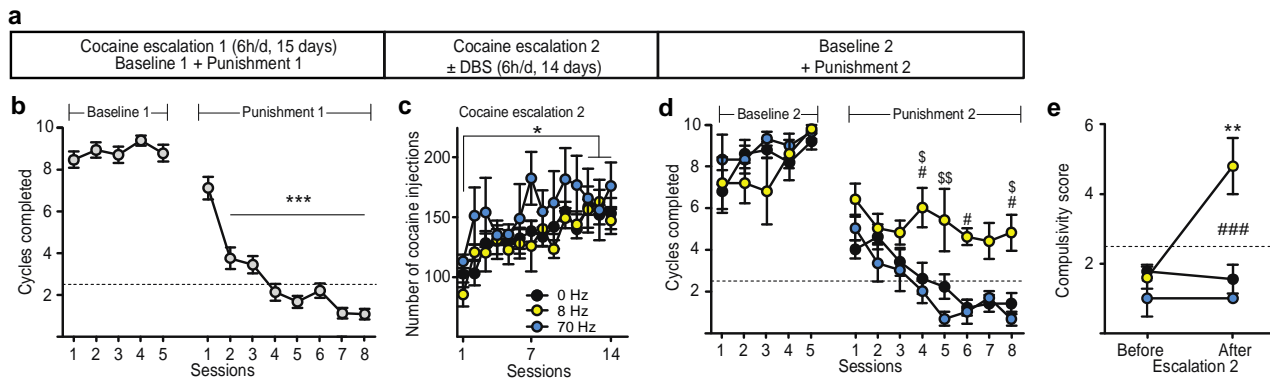

425

426 **Figure 3. STN 8 Hz DBS triggers cocaine compulsive seeking in shock-sensitive rats. a,**

427 Experimental time course. Following cocaine escalation and punishment protocols and

428 characterization of the compulsive status of the animals, shock-sensitive rats were subjected to a

429 second escalation procedure during which some of the animals received STN DBS at 8 Hz (n = 5) or

430 at 70 Hz (n = 3), while the others remained OFF stimulation (n = 5). They were then all tested a

431 second time in the punishment paradigm. **b**, Shock delivery during punishment 1 abolished cocaine

432 seeking in all shock-sensitive rats (n = 13,  $F_{(12,144)} = 150.7$   $P < 0.0001$ ; Bonferroni post hoc:  $***P <$

433 0.001, vs. baseline). **c**, STN DBS (black dots: 0 Hz, n = 5; yellow dots: 8 Hz, n = 5; blue dots: 70 Hz, n

434 = 3) during cocaine escalation 2 did not alter escalation of cocaine intake (session effect:  $F_{(13,130)} =$

435 5.936,  $P < 0.0001$ ; group effect:  $F_{(2,130)} = 2.099$ , n.s.; Bonferroni post hoc:  $*P < 0.05$ ).

436 **d**, Punishment 2 reduced the number of seeking cycles completed in all groups (punishment effect:  $F_{(12,120)} = 40.94$ ,  $P <$

437 0.0001). While all groups displayed equivalent level of cocaine seeking during baseline 2 (group

438 effect:  $F_{(2,40)} = 0.529$ , n.s.), 8 Hz-stimulated rats (yellow dots) completed more seeking cycles than 0

439 Hz- (black dots) and 70Hz-stimulated rats (blue dots) (punishment effect:  $F_{(7,70)} = 9.108$ ,  $P < 0.0001$ ;

440 group effect:  $F_{(2,70)} = 10.48$ ,  $P = 0.0035$ ; Bonferroni post hoc:  $^{\#}P < 0.05$ , 8 Hz vs. 0 Hz;  $^{\$}P < 0.05$ ,  $^{\$\$}P <$

441 0.01, 8 Hz vs. 70 Hz) during punishment 2. **e**, Compulsivity score before and after cocaine escalation

442 2 (before/after x group effect:  $F_{(2,10)} = 7.705$ ,  $P = 0.0094$ ; Bonferroni post hoc:  $**P < 0.001$ , after vs.

443 before,  $^{\#\#\#}P < 0.001$ , 8 Hz vs. 0 / 70 Hz). Dashed lines indicate compulsivity threshold below which

444 animals are considered shock-sensitive. Line graphs indicate mean  $\pm$  s.e.m.

445

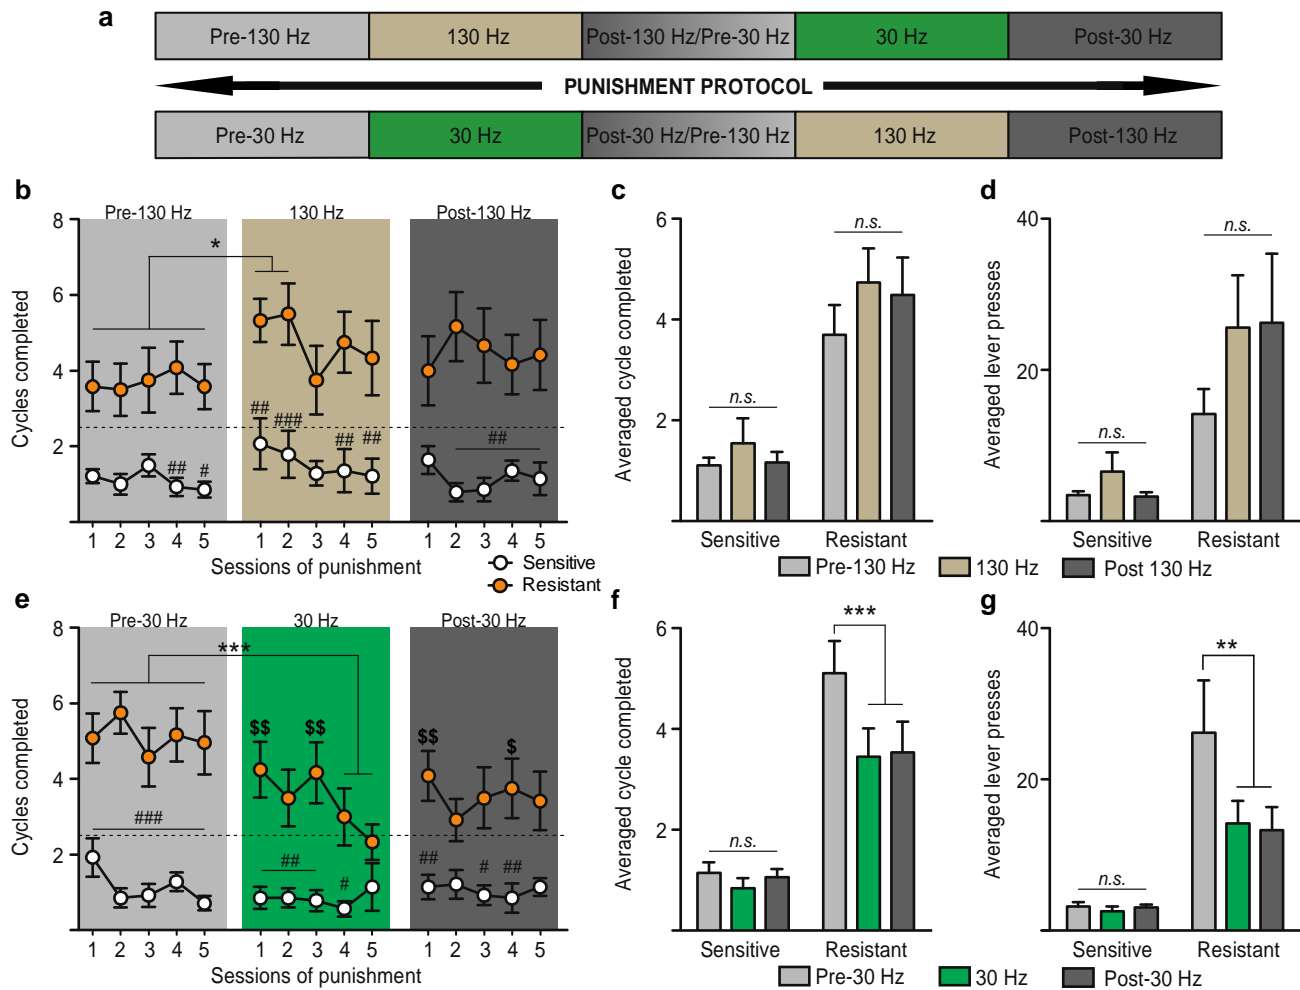

446

447 **Figure 4. STN low frequency DBS reduces compulsive cocaine seeking during punishment. a,**

448 Experimental time course. Top: After five days of seeking under punishment and characterization of

449 their compulsive status, animals were subjected to five days of 130 Hz STN DBS followed by 5 days

450 with no DBS (Post-130 Hz/Pre-30 Hz). Animals were then stimulated for five sessions with 30 Hz DBS

451 followed by 5 days with no DBS (Post-30 Hz). Bottom: Treatment order was counterbalanced for ~half

452 of the rats. **b,** 130 Hz STN DBS acutely increased the number of seeking cycles completed by shock-

453 resistant rats (orange dots;  $n = 12$ , DBS effect:  $F_{(14,336)} = 1.764$ ,  $P = 0.0427$ ), but had no effect in

454 shock-sensitive animals (white dots;  $n = 14$ , group effect,  $F_{(1,336)} = 26.01$ ,  $P < 0.0001$ ; DBS x group

455 effect:  $F_{(14,336)} = 0.911$ , *n.s.*; Bonferroni post hoc: \* $P < 0.05$ ; # $P < 0.05$ , ## $P < 0.01$ , ### $P < 0.001$ ,

456 resistant vs. sensitive). **c,** Averaged number of cycle completed by shock-sensitive (left) and -resistant

457 (right) rats before (pale grey), during (brown) and after (dark grey) 130 Hz STN DBS (DBS effect:

458  $F_{(2,48)} = 2.489$ , *n.s.*; group effect:  $F_{(1,48)} = 26.01$ ,  $P < 0.0001$ ; DBS x group effect:  $F_{(2,48)} = 0.677$ , *n.s.*). **d,**

459 Averaged number of lever presses by shock-sensitive (left) and resistant (right) rats before (pale grey),  
460 during (brown) and after (dark grey) 130 Hz STN DBS (DBS effect:  $F_{(2,48)} = 1.716$ , *n.s.*; group effect:  
461  $F_{(1,48)} = 15.48$ ,  $P = 0.0006$ ; DBS x group effect:  $F_{(2,48)} = 1.118$ , *n.s.*). **e**, 30 Hz STN DBS reduced the  
462 number of seeking cycles completed by shock-resistant rats (DBS effect:  $F_{(14,336)} = 3.494$ ,  $P < 0.0001$ ),  
463 but had no effect in shock-sensitive animals (group effect,  $F_{(1,336)} = 33.67$ ,  $P < 0.0001$ ; DBS x group  
464 effect:  $F_{(14,336)} = 2.848$ ,  $P = 0.0005$ ; Bonferroni post hoc:  $***P < 0.001$ ;  $^{\$}P < 0.05$ ,  $^{\$\$}P < 0.01$  vs. last  
465 session of 30 Hz DBS;  $^{\#}P < 0.05$ ,  $^{\#\#}P < 0.01$ ,  $^{\#\#\#}P < 0.001$ , resistant vs. sensitive). **f**, Averaged number  
466 of cycle completed by shock-sensitive (left) and -resistant (right) rats before (pale grey), during (green)  
467 and after (dark grey) 30 Hz STN DBS (group effect:  $F_{(1,48)} = 33.67$ ,  $P < 0.0001$ ; DBS effect:  $F_{(2,48)} =$   
468  $9.416$ ,  $P = 0.0004$ ; DBS x group effect:  $F_{(2,48)} = 5.75$ ,  $P = 0.0058$ ; Bonferroni post hoc:  $**P < 0.01$ ). **g**,  
469 Averaged number of lever presses by shock-sensitive (left) and -resistant (right) rats before (pale  
470 grey), during (green) and after (dark grey) 30 Hz STN DBS (group effect:  $F_{(1,48)} = 19.1$ ,  $P = 0.0002$ ;  
471 DBS effect:  $F_{(2,48)} = 4.996$ ,  $P = 0.0107$ ; DBS x group effect:  $F_{(2,48)} = 4.415$ ,  $P = 0.0174$ ; Bonferroni post  
472 hoc:  $**P < 0.01$ ). Dashed lines indicate compulsivity threshold below which animals are considered  
473 shock-sensitive. Line and bar graphs indicate mean  $\pm$  s.e.m.  
474
